# Supplementary material for: Constructing novel Cd(ii) metal–organic frameworks based on different highly connected secondary building units via alteration of reaction conditions
Source: Royal Society of Chemistry journal article supplement (doi:10.1039/c5dt02987b), 2015-01-01
Supplement: c5dt02987b1.pdf [file c5dt02987b1.pdf]

**Electronic Supplementary Information (ESI)**  
**for**  
**Constructing novel Cd(II) metal-organic frameworks based**  
**on different highly connected secondary building units *via***  
**reaction condition alteration**

Yan-Qing Liu, Guo-Jian Ren, Ying-Hui Zhang\*, Jian Xu\* and Xian-He Bu

*School of Materials Science and Engineering, School of Chemistry, Tianjin Key Lab on Metal and Molecule-based Material Chemistry, Nankai University, Tianjin 300071, China.*

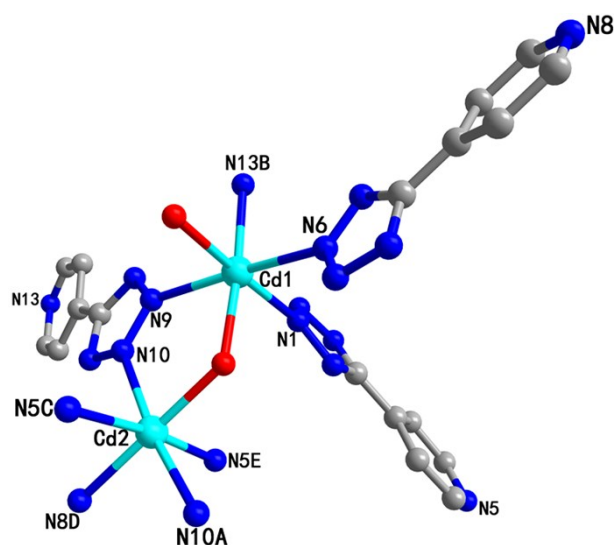

**Fig. S1** Coordination environments of Cd1 and Cd2 in **1**. Symmetry code:  
 A:  $x, 3/2-y, 3/2-z$ ; B:  $3/2+x, y, 2-z$ ; C:  $3/2-x, -1/2+y, 3/2-z$ ; D:  $-1+x, y, z$ ;  
 E:  $3/2-x, 2-y, z$ .

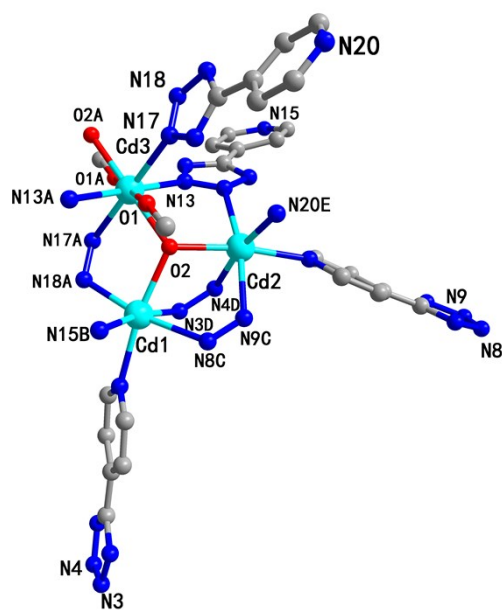

**Fig. S2** Coordination environments of Cd1, Cd2 and Cd3 in **2**. Symmetry code:  
 A:  $1-x, 1-y, 1-z$ ; B:  $x, -1+y, z$ ; C:  $1/2-x, -1/2+y, 3/2-z$ ; D:  $3/2-x, -1/2+y, 3/2-z$ ; E:  $-x, 1-y, 1-z$ .

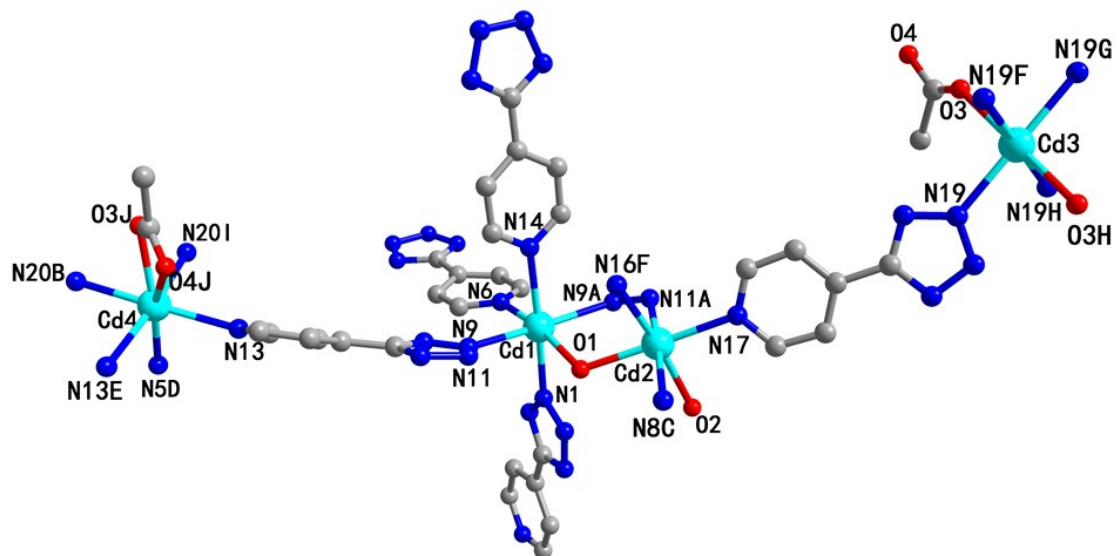

**Fig. S3** Coordination environments of Cd1-4 in **3**. Symmetry code: A:  $x, 1-y, z$ ; B:  $x, 1+y, 1+z$ ; C:  $x, 1-y, -1+z$ ; D:  $1/2-x, 1/2+y, 2-z$ ; E:  $x, 2-y, z$ ; F:  $-x, y, -z$ ; G:  $-x, -y, -z$ ; H:  $x, -y, z$ ; I:  $x, 1-y, 1+z$ ; J:  $-x, 1+y, 1-z$ .

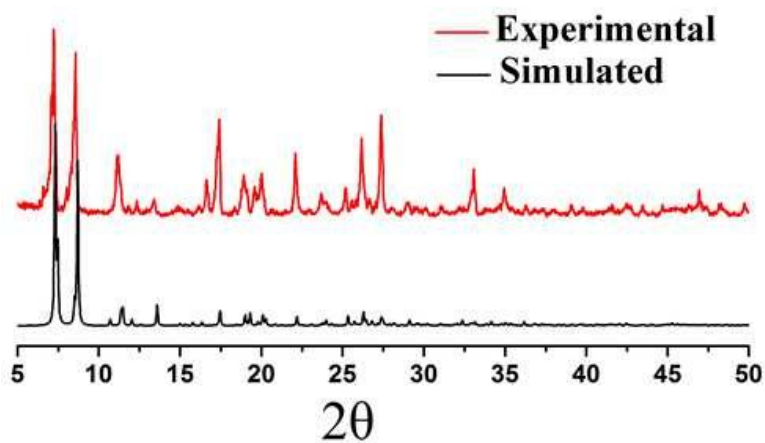

**Fig. S4** Simulated and experimental PXRD patterns of compound **1**.

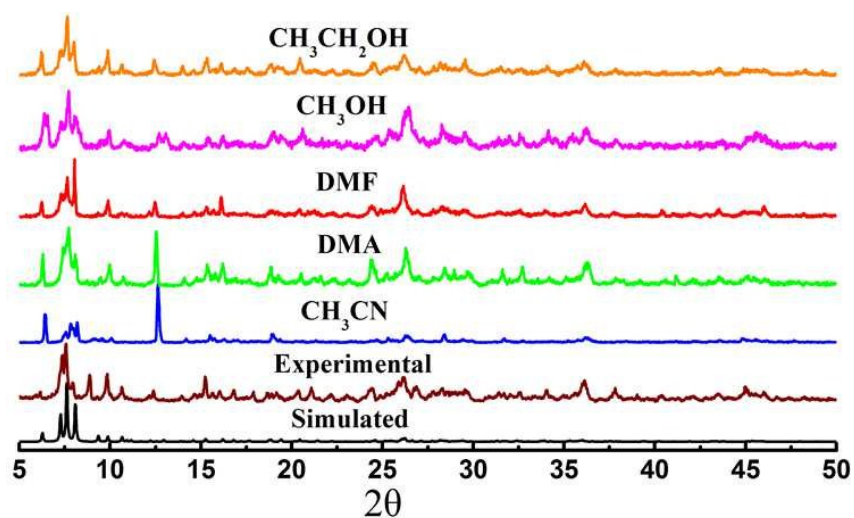

**Fig. S5** Simulated and experimental PXRD patterns of as-synthesized **2** and samples soak in common organic solvents for three days.

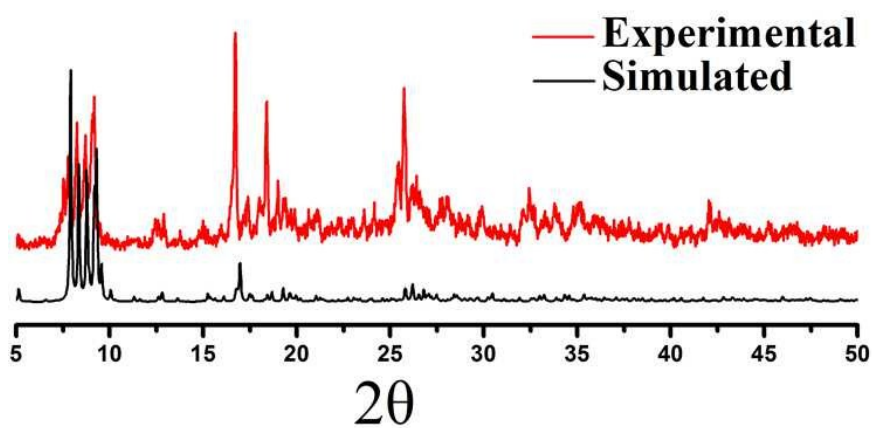

**Fig. S6** Simulated and experimental PXRD patterns of compound **3**.

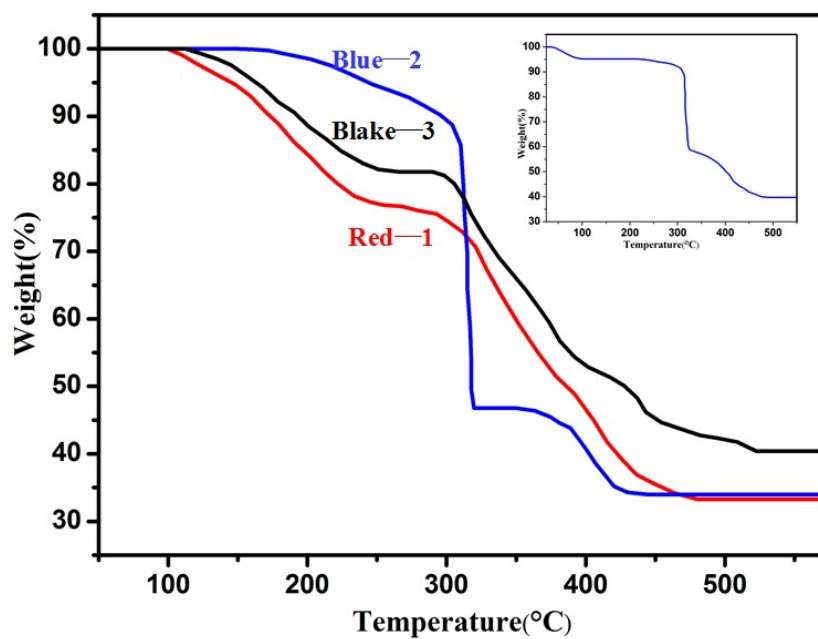

**Fig. S7** Thermogravimetric profiles for 1-3. Red line: 1; Blue line: 2; Black line: 3; The insert figure: activated compound 2.

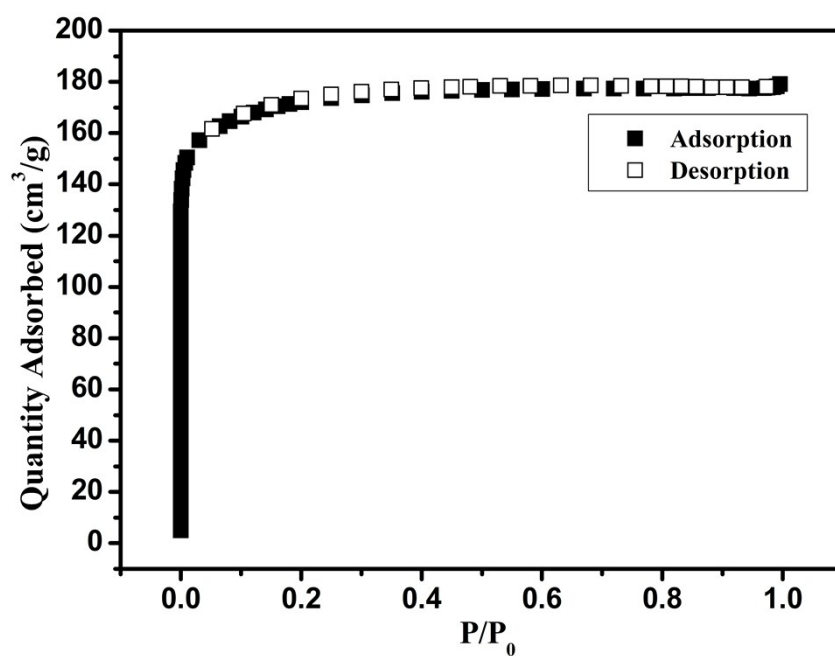

**Fig. S8** The N<sub>2</sub> adsorption isotherms of 2.

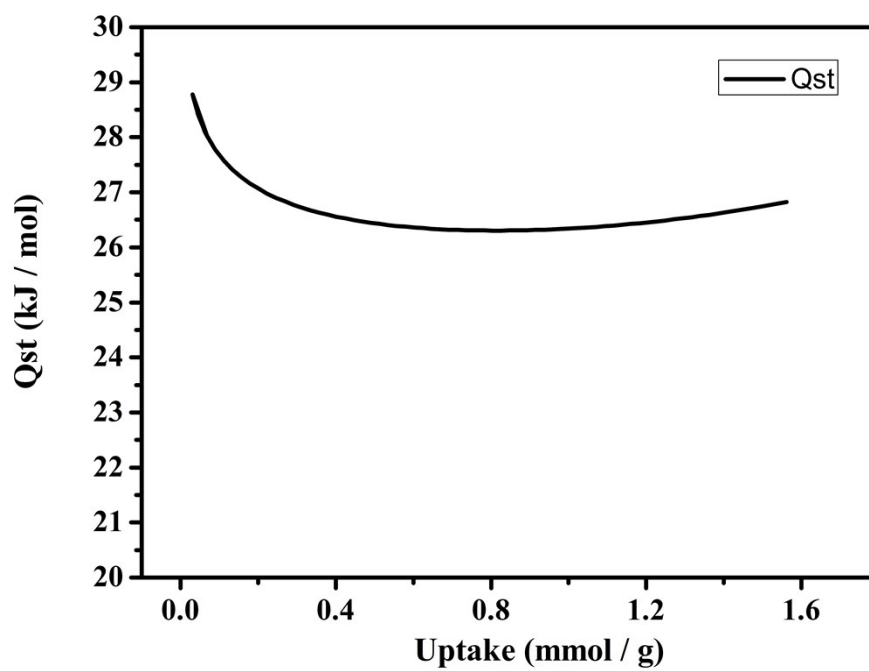

**Fig. S9** The isotheric heat of adsorption (Qst) for the CO<sub>2</sub> adsorption of **2**.

**Table S1** The summarization of the coordination modes of 4-ptz ligand in literatures. Color scheme: metal centers (green) and the others are the same with compound **1**.

| Bridging mode                                                                       | Ref  | Bridging mode                                                                        | Ref |
|-------------------------------------------------------------------------------------|------|--------------------------------------------------------------------------------------|-----|
| 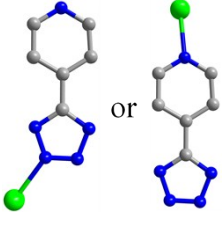   | 1    |    | 5   |
| $\mu_1$ -bridging mode                                                              |      | $\mu_5$ -bridging mode                                                               |     |
|   | 1,2  |   | 3a  |
| $\mu_2$ -bridging mode                                                              |      | $\mu_3$ -, $\mu_4$ - bridging mode                                                   |     |
|  | 2d,3 |  | 3a  |
| $\mu_3$ -bridging mode                                                              |      | $\mu_3$ -, $\mu_5$ - bridging mode                                                   |     |
|  | 2a,4 |                                                                                      |     |
| $\mu_4$ -bridging mode                                                              |      |                                                                                      |     |

**Table S2** Crystal Data and Structure Refinements for MOFs **1-3**.

| <i>Compounds</i>                                                | <b>1</b>                                                                        | <b>2</b>                                                                        | <b>3</b>                                                                          |
|-----------------------------------------------------------------|---------------------------------------------------------------------------------|---------------------------------------------------------------------------------|-----------------------------------------------------------------------------------|
| Empirical formula                                               | C <sub>43</sub> H <sub>66</sub> Cd <sub>3</sub> N <sub>28</sub> O <sub>12</sub> | C <sub>61</sub> H <sub>80</sub> Cd <sub>5</sub> N <sub>42</sub> O <sub>13</sub> | C <sub>123</sub> H <sub>158</sub> Cd <sub>9</sub> N <sub>78</sub> O <sub>22</sub> |
| Formula weight                                                  | 1504.40                                                                         | 2171.65                                                                         | 4092.86                                                                           |
| Crystal system                                                  | Orthorhombic                                                                    | Monoclinic                                                                      | Monoclinic                                                                        |
| Space group                                                     | Pnna                                                                            | P21/n                                                                           | C2/m                                                                              |
| Temperature                                                     | 293k                                                                            | 113k                                                                            | 293k                                                                              |
| <i>a</i> [Å]                                                    | 14.044(3)                                                                       | 12.6177(19)                                                                     | 39.073(8)                                                                         |
| <i>b</i> [Å]                                                    | 20.297(4)                                                                       | 12.5869(18)                                                                     | 19.229(4)                                                                         |
| <i>c</i> [Å]                                                    | 23.635(5)                                                                       | 28.561(4)                                                                       | 13.798(3)                                                                         |
| $\alpha$ [°]                                                    | 90                                                                              | 90                                                                              | 90                                                                                |
| $\beta$ [°]                                                     | 90                                                                              | 96.843(2)                                                                       | 103.60(3)                                                                         |
| $\gamma$ [°]                                                    | 90                                                                              | 90                                                                              | 90                                                                                |
| <i>V</i> [Å <sup>3</sup> ]                                      | 6737(2)                                                                         | 4503.6(11)                                                                      | 10076(4)                                                                          |
| <i>Z</i>                                                        | 4                                                                               | 2                                                                               | 2                                                                                 |
| <i>D<sub>c</sub></i> [g/cm <sup>-3</sup> ]                      | 1.478                                                                           | 1.598                                                                           | 1.346                                                                             |
| $\mu$ [mm <sup>-1</sup> ]                                       | 1.010                                                                           | 1.239                                                                           | 1.000                                                                             |
| <i>F</i> (000)                                                  | 3020.0                                                                          | 2160.0                                                                          | 4080.0                                                                            |
| <i>unique reflns</i>                                            | 5939                                                                            | 7926                                                                            | 9205                                                                              |
| <i>GOF on F</i> <sup>2</sup>                                    | 0.975                                                                           | 1.366                                                                           | 1.033                                                                             |
| <i>R<sub>I</sub></i> ( <i>I</i> > 2σ( <i>I</i> )) <sup>a</sup>  | 0.0818(3758)                                                                    | 0.1205(7846)                                                                    | 0.0583(6762)                                                                      |
| <i>wR<sub>2</sub></i> ( <i>I</i> > 2σ( <i>I</i> )) <sup>b</sup> | 0.2257(5939)                                                                    | 0.3212(7926)                                                                    | 0.1502(9205)                                                                      |

<sup>a</sup> $R_I = \sum ||F_o| - |F_c|| / \sum |F_o|$ . <sup>b</sup>  $wR_2 = \{ \sum [w(F_o^2 - F_c^2)^2] / \sum w(F_o^2)^2 \}^{1/2}$



**Table S3** Bond lengths (Å) and angles (°) for MOFs **1-3**.

---

**1**

|                 |           |                      |            |
|-----------------|-----------|----------------------|------------|
| N(13)-Cd(1)#1   | 2.372(7)  | N(6)-Cd(1)-N(13)#2   | 95.6(3)    |
| Cd(1)-O(1)      | 2.292(7)  | O(1)-Cd(1)-N(9)      | 85.6(3)    |
| Cd(1)-N(1)      | 2.355(8)  | N(1)-Cd(1)-N(9)      | 93.6(3)    |
| Cd(1)-O(2)      | 2.358(7)  | O(2)-Cd(1)-N(9)      | 90.3(3)    |
| Cd(1)-N(6)      | 2.353(8)  | N(6)-Cd(1)-N(9)      | 171.8(3)   |
| Cd(1)-N(13)#2   | 2.372(7)  | N(13)#2-Cd(1)-N(9)   | 91.0(3)    |
| Cd(1)-N(9)      | 2.379(8)  | O(1)-Cd(2)-N(5)#3    | 93.77(19)  |
| Cd(2)-O(1)      | 2.246(14) | O(1)-Cd(2)-N(5)#4    | 93.8(2)    |
| Cd(2)-N(5)#3    | 2.357(7)  | N(5)#3-Cd(2)-N(5)#4  | 172.5(4)   |
| Cd(2)-N(5)#4    | 2.357(7)  | O(1)-Cd(2)-N(8)#5    | 180.000(3) |
| Cd(2)-N(8)#5    | 2.383(10) | N(5)#3-Cd(2)-N(8)#5  | 86.2(2)    |
| Cd(2)-N(10)     | 2.377(8)  | N(5)#4-Cd(2)-N(8)#5  | 86.2(2)    |
| Cd(2)-N(10)#6   | 2.377(8)  | O(1)-Cd(2)-N(10)     | 85.92(19)  |
| O(1)-Cd(1)#6    | 2.292(7)  | N(5)#3-Cd(2)-N(10)   | 91.6(3)    |
| N(5)-Cd(2)#4    | 2.357(7)  | N(5)#4-Cd(2)-N(10)   | 88.9(3)    |
| N(8)-Cd(2)#7    | 2.383(10) | N(8)#5-Cd(2)-N(10)   | 94.08(19)  |
| O(1)-Cd(1)-N(1) | 90.46(19) | O(1)-Cd(2)-N(10)#6   | 85.92(19)  |
| O(1)-Cd(1)-O(2) | 88.39(18) | N(5)#3-Cd(2)-N(10)#6 | 88.9(3)    |
| N(1)-Cd(1)-O(2) | 175.9(3)  | N(5)#4-Cd(2)-N(10)#6 | 91.6(3)    |
| O(1)-Cd(1)-N(6) | 87.6(3)   | N(8)#5-Cd(2)-N(10)#6 | 94.08(19)  |
| N(1)-Cd(1)-N(6) | 91.0(3)   | N(10)-Cd(2)-N(10)#6  | 171.8(4)   |
| O(2)-Cd(1)-N(6) | 85.0(3)   | Cd(2)-O(1)-Cd(1)     | 121.1(3)   |

|                    |          |                    |          |
|--------------------|----------|--------------------|----------|
| O(1)-Cd(1)-N(13)#2 | 175.7(3) | Cd(2)-O(1)-Cd(1)#6 | 121.1(3) |
| N(1)-Cd(1)-N(13)#2 | 92.4(3)  | Cd(1)-O(1)-Cd(1)#6 | 117.8(6) |
| O(2)-Cd(1)-N(13)#2 | 89.0(3)  |                    |          |

Symmetry codes: #1  $x-1/2, y, -z+2$ ; #2  $x+1/2, y, -z+2$ ; #3  $-x+3/2, y-1/2, -z+3/2$ ; #4  $-x+3/2, -y+2, z$ ; #5  $x-1, y, z$ ; #6  $x, -y+3/2, -z+3/2$ ; #7  $x+1, y, z$ .

---

## 2

|               |           |                       |           |
|---------------|-----------|-----------------------|-----------|
| Cd(1)-O(2)    | 2.291(11) | Cd(3)-N(17)           | 2.397(13) |
| Cd(1)-N(18)#1 | 2.337(16) | N(4)-Cd(2)#6          | 2.382(15) |
| Cd(1)-N(1)    | 2.345(15) | N(3)-Cd(1)#6          | 2.385(15) |
| Cd(1)-N(15)#2 | 2.371(15) | N(8)-Cd(1)#8          | 2.405(15) |
| Cd(1)-N(3)#3  | 2.385(15) | N(9)-Cd(2)#8          | 2.382(14) |
| Cd(1)-N(8)#4  | 2.405(15) | N(18)-Cd(1)#1         | 2.337(16) |
| Cd(2)-O(2)    | 2.267(11) | N(20)-Cd(2)#5         | 2.331(17) |
| Cd(2)-N(20)#5 | 2.331(17) | O(2)-Cd(1)-N(18)#1    | 89.1(5)   |
| Cd(2)-N(6)    | 2.347(15) | O(2)-Cd(1)-N(1)       | 170.4(5)  |
| Cd(2)-N(12)   | 2.360(15) | N(18)#1-Cd(1)-N(1)    | 97.9(6)   |
| Cd(2)-N(4)#3  | 2.382(15) | O(2)-Cd(1)-N(15)#2    | 99.7(5)   |
| Cd(2)-N(9)#4  | 2.382(14) | N(18)#1-Cd(1)-N(15)#2 | 99.9(6)   |
| Cd(3)-O(2)#1  | 2.227(11) | N(1)-Cd(1)-N(15)#2    | 85.7(6)   |
| Cd(3)-O(2)    | 2.227(11) | O(2)-Cd(1)-N(3)#3     | 85.5(4)   |
| Cd(3)-O(1)    | 2.360(10) | N(18)#1-Cd(1)-N(3)#3  | 87.9(6)   |
| Cd(3)-O(1)#1  | 2.360(10) | N(1)-Cd(1)-N(3)#3     | 88.2(6)   |
| Cd(3)-N(13)   | 2.383(14) | N(15)#2-Cd(1)-N(3)#3  | 170.7(5)  |
| Cd(3)-N(13)#1 | 2.383(14) | O(2)-Cd(1)-N(8)#4     | 82.1(4)   |

|                      |            |                       |            |
|----------------------|------------|-----------------------|------------|
| Cd(3)-N(17)#1        | 2.397(14)  | N(18)#1-Cd(1)-N(8)#4  | 168.5(5)   |
| N(1)-Cd(1)-N(8)#4    | 90.2(5)    | O(2)-Cd(3)-O(1)#1     | 125.3(4)   |
| N(15)#2-Cd(1)-N(8)#4 | 88.8(5)    | O(1)-Cd(3)-O(1)#1     | 180.000(1) |
| N(3)#3-Cd(1)-N(8)#4  | 84.2(5)    | O(2)#1-Cd(3)-N(13)    | 93.8(4)    |
| O(2)-Cd(2)-N(20)#5   | 98.8(5)    | O(2)-Cd(3)-N(13)      | 86.2(4)    |
| O(2)-Cd(2)-N(6)      | 171.7(5)   | O(1)-Cd(3)-N(13)      | 120.7(4)   |
| N(20)#5-Cd(2)-N(6)   | 86.0(6)    | O(1)#1-Cd(3)-N(13)    | 59.3(4)    |
| O(2)-Cd(2)-N(12)     | 88.8(5)    | O(2)#1-Cd(3)-N(13)#1  | 86.2(4)    |
| N(20)#5-Cd(2)-N(12)  | 101.1(6)   | O(2)-Cd(3)-N(13)#1    | 93.8(4)    |
| N(6)-Cd(2)-N(12)     | 96.9(6)    | O(1)-Cd(3)-N(13)#1    | 59.3(4)    |
| O(2)-Cd(2)-N(4)#3    | 86.5(4)    | O(1)#1-Cd(3)-N(13)#1  | 120.7(4)   |
| N(20)#5-Cd(2)-N(4)#3 | 170.4(6)   | N(13)-Cd(3)-N(13)#1   | 180.000(2) |
| N(6)-Cd(2)-N(4)#3    | 87.8(5)    | O(2)#1-Cd(3)-N(17)#1  | 93.2(4)    |
| N(12)-Cd(2)-N(4)#3   | 86.9(5)    | O(2)-Cd(3)-N(17)#1    | 86.8(4)    |
| O(2)-Cd(2)-N(9)#4    | 83.7(4)    | O(1)-Cd(3)-N(17)#1    | 121.8(4)   |
| N(20)#5-Cd(2)-N(9)#4 | 89.2(6)    | O(1)#1-Cd(3)-N(17)#1  | 58.2(4)    |
| N(6)-Cd(2)-N(9)#4    | 89.7(5)    | N(13)-Cd(3)-N(17)#1   | 94.1(5)    |
| N(12)-Cd(2)-N(9)#4   | 168.1(5)   | N(13)#1-Cd(3)-N(17)#1 | 85.9(5)    |
| N(4)#3-Cd(2)-N(9)#4  | 83.4(5)    | O(2)#1-Cd(3)-N(17)    | 86.8(4)    |
| O(2)#1-Cd(3)-O(2)    | 180.000(2) | O(2)-Cd(3)-N(17)      | 93.2(4)    |
| O(2)#1-Cd(3)-O(1)    | 125.3(4)   | O(1)-Cd(3)-N(17)      | 58.2(4)    |
| O(2)-Cd(3)-O(1)      | 54.7(4)    | O(1)#1-Cd(3)-N(17)    | 121.8(4)   |
| O(2)#1-Cd(3)-O(1)#1  | 54.7(4)    | N(13)-Cd(3)-N(17)     | 85.9(5)    |
| N(17)#1-Cd(3)-N(17)  | 180.000(2) | N(13)#1-Cd(3)-N(17)   | 94.1(5)    |

|                  |          |                  |          |
|------------------|----------|------------------|----------|
| Cd(3)-O(2)-Cd(2) | 116.3(5) | Cd(3)-O(2)-Cd(1) | 115.7(5) |
| Cd(2)-O(2)-Cd(1) | 109.6(4) |                  |          |

Symmetry codes: #1 -x+1,-y+1,-z+1, #2 x,y-1,z, #3 -x+3/2,y+1/2,-z+3/2, #4 -x+1/2,y-1/2,-z+3/2, #5 -x,-y+1,-z+1, #6 -x+3/2,y-1/2,-z+3/2, #7 x,y+1,z, #8 -x+1/2,y+1/2,-z+3/2.

### 3

|               |          |                       |           |
|---------------|----------|-----------------------|-----------|
| Cd(1)-O(1)    | 2.270(5) | O(3)-Cd(3)-N(19)#2    | 80.6(2)   |
| Cd(1)-N(6)    | 2.287(8) | N(19)#3-Cd(3)-N(19)#2 | 94.5(3)   |
| Cd(1)-N(1)    | 2.302(8) | N(19)-Cd(3)-N(19)#2   | 180.0(3)  |
| Cd(1)-N(9)#1  | 2.340(5) | O(3)#2-Cd(3)-N(19)#4  | 99.4(2)   |
| Cd(1)-N(9)    | 2.340(5) | O(3)-Cd(3)-N(19)#4    | 80.6(2)   |
| Cd(1)-N(14)   | 2.379(8) | N(19)#3-Cd(3)-N(19)#4 | 180.0(2)  |
| Cd(3)-O(3)#2  | 2.258(8) | N(19)-Cd(3)-N(19)#4   | 94.5(3)   |
| Cd(3)-O(3)    | 2.258(8) | N(19)#2-Cd(3)-N(19)#4 | 85.5(3)   |
| Cd(3)-N(19)#3 | 2.293(6) | O(1)-Cd(2)-N(17)      | 175.4(2)  |
| Cd(3)-N(19)   | 2.293(6) | O(1)-Cd(2)-N(11)#1    | 88.08(18) |
| Cd(3)-N(19)#2 | 2.293(6) | N(17)-Cd(2)-N(11)#1   | 95.0(2)   |
| Cd(3)-N(19)#4 | 2.293(6) | O(1)-Cd(2)-N(16)#5    | 81.80(19) |
| Cd(2)-O(1)    | 2.219(3) | N(17)-Cd(2)-N(16)#5   | 94.4(2)   |
| Cd(2)-N(17)   | 2.271(6) | N(11)#1-Cd(2)-N(16)#5 | 95.9(2)   |
| Cd(2)-N(11)#1 | 2.304(5) | O(1)-Cd(2)-N(8)#6     | 88.06(19) |
| Cd(2)-N(16)#5 | 2.331(5) | N(17)-Cd(2)-N(8)#6    | 89.1(2)   |
| Cd(2)-N(8)#6  | 2.333(5) | N(11)#1-Cd(2)-N(8)#6  | 174.5(2)  |
| Cd(2)-O(2)    | 2.450(9) | N(16)#5-Cd(2)-N(8)#6  | 87.4(2)   |

|                   |           |                         |            |
|-------------------|-----------|-------------------------|------------|
| Cd(4)-O(3)#7      | 2.295(7)  | O(1)-Cd(2)-O(2)         | 93.3(2)    |
| Cd(4)-N(13)#8     | 2.330(5)  | N(17)-Cd(2)-O(2)        | 90.3(2)    |
| Cd(4)-N(13)       | 2.330(5)  | N(11)#1-Cd(2)-O(2)      | 86.7(2)    |
| Cd(4)-N(5)#9      | 2.363(7)  | N(16)#5-Cd(2)-O(2)      | 174.4(2)   |
| Cd(4)-N(20)#10    | 2.397(5)  | N(8)#6-Cd(2)-O(2)       | 89.6(3)    |
| Cd(4)-N(20)#11    | 2.397(6)  | O(3)#7-Cd(4)-N(13)#8    | 108.7(2)   |
| N(11)-Cd(2)#1     | 2.304(5)  | O(3)#7-Cd(4)-N(13)      | 108.7(2)   |
| N(8)-Cd(2)#11     | 2.333(5)  | N(13)#8-Cd(4)-N(13)     | 100.3(3)   |
| N(20)-Cd(4)#12    | 2.397(5)  | O(3)#7-Cd(4)-N(5)#9     | 157.2(3)   |
| N(16)-Cd(2)#5     | 2.331(5)  | N(13)#8-Cd(4)-N(5)#9    | 85.4(2)    |
| N(5)-Cd(4)#9      | 2.363(7)  | N(13)-Cd(4)-N(5)#9      | 85.4(2)    |
| O(1)-Cd(2)#1      | 2.219(3)  | O(3)#7-Cd(4)-N(20)#10   | 77.7(2)    |
| O(3)-Cd(4)#7      | 2.295(7)  | N(13)#8-Cd(4)-N(20)#10  | 88.7(2)    |
| O(1)-Cd(1)-N(6)   | 167.5(3)  | N(13)-Cd(4)-N(20)#10    | 166.2(2)   |
| O(1)-Cd(1)-N(1)   | 81.1(3)   | N(5)#9-Cd(4)-N(20)#10   | 85.0(2)    |
| N(6)-Cd(1)-N(1)   | 86.4(3)   | O(3)#7-Cd(4)-N(20)#11   | 77.7(2)    |
| O(1)-Cd(1)-N(9)#1 | 85.33(14) | N(13)#8-Cd(4)-N(20)#11  | 166.2(2)   |
| N(6)-Cd(1)-N(9)#1 | 95.65(14) | N(13)-Cd(4)-N(20)#11    | 88.7(2)    |
| N(1)-Cd(1)-N(9)#1 | 94.25(14) | N(5)#9-Cd(4)-N(20)#11   | 85.0(2)    |
| O(1)-Cd(1)-N(9)   | 85.33(14) | N(20)#10-Cd(4)-N(20)#11 | 80.7(3)    |
| N(6)-Cd(1)-N(9)   | 95.65(13) | Cd(2)-O(1)-Cd(2)#1      | 107.6(2)   |
| N(1)-Cd(1)-N(9)   | 94.25(14) | Cd(2)-O(1)-Cd(1)        | 116.42(16) |
| N(9)#1-Cd(1)-N(9) | 166.3(3)  | Cd(2)#1-O(1)-Cd(1)      | 116.42(16) |
| O(1)-Cd(1)-N(14)  | 104.4(3)  | Cd(3)-O(3)-Cd(4)#7      | 115.6(4)   |

|                      |           |                      |         |
|----------------------|-----------|----------------------|---------|
| N(6)-Cd(1)-N(14)     | 88.1(3)   | O(3)#2-Cd(3)-N(19)#3 | 80.6(2) |
| N(1)-Cd(1)-N(14)     | 174.5(3)  | O(3)-Cd(3)-N(19)#3   | 99.4(2) |
| N(9)#1-Cd(1)-N(14)   | 86.29(14) | O(3)#2-Cd(3)-N(19)   | 80.6(2) |
| N(9)-Cd(1)-N(14)     | 86.29(14) | O(3)-Cd(3)-N(19)     | 99.4(2) |
| O(3)#2-Cd(3)-O(3)    | 180.0(3)  | N(19)#3-Cd(3)-N(19)  | 85.5(3) |
| O(3)#2-Cd(3)-N(19)#3 | 80.6(2)   |                      |         |

Symmetry codes: #1  $x, -y+1, z$ ; #2  $-x, -y, -z$ ; #3  $x, -y, z$ ; #4  $-x, y, -z$ ; #5  $-x, y, -z+1$ ; #6  $x, -y+1, z-1$ ; #7  $-x, -y+1, -z+1$ ; #8  $x, -y+2, z$ ; #9  $-x+1/2, -y+3/2, -z+2$ ; #10  $x, y+1, z+1$ ; #11  $x, -y+1, z+1$ ; #12  $x, y-1, z-1$ .

---

## References

- 1 W. Yang, X. Lin, A. J. Blake, C. Wilson, P. Hubberstey, N. R. Champness and M. Schroder, *CrystEngCom*, 2009, **11**, 67-81.
- 2 (a) C. Jiang, Z. Yu, S. Wang, C. Jiao, J. Li, Z. Wang and Y. Cui, *Eur. J. Inorg. Chem.*, 2004, **18**, 3662-3667; (b) R. Nasani, M. Saha, S. M. Mobin, L. M. Martins, A. J. Pombeiro, A. M. Kirillov and S. Mukhopadhyay, *Dalton. Trans.*, 2014, **43**, 9944-9954; (c) S. Mukhopadhyay, B. G. Mukhopadhyay, M. F. C. G. d. Silva, J. Lasri, M. A. J. Charmier and A. J. L. Pombeiro, *Inorg. Chem.*, 2008, **47**, 11334-11341; (d) X. Xue, X.-S. Wang, L.-Z. Wang, R.-G. Xiong, B. F. Abrahams, X.-Z. You, Z.-L. Xue and C.-M. Che, *Inorg. Chem.*, 2002, **41**, 6544-6546.
- 3 (a) W. Ouellette and J. Zubieta, *Chem. Commun.*, 2009, **30**, 4533-4535; (b) T. Wen, X. P. Zhou, D. X. Zhang and D. Li, *Chem.-Eur. J.*, 2014, **20**, 644-648; (c) S. Bhandari, C. G. Frost, C. E. Hague, M. F. Mahon and K. C. Molloy, *Dalton. Trans.*, 2000, **5**, 663-669; (d) P. Pachfule and R. Banerjee, *Cryst. Growth Des.*, 2011, **11**, 5176-5181; (e) F. Yang, B. Li, W. Xu, G. Li, Q. Zhou, J. Hua, Z. Shi and S. Feng, *Inorg. Chem.*, 2012, **51**, 6813-6820; (f) W. Ouellette, H. Liu, C. J. O'Connor and J. Zubieta, *Inorg. Chem.*, 2009, **48**, 4655-4657; (g) T. T. Luo, H. L. Tsai, S. L. Yang, Y. H. Liu, R. D. Yadav, C. C. Su, C. H. Ueng, L. G. Lin and K. L. Lu, *Angew. Chem., Int. Ed.*, 2005, **44**, 6063-6067; (h) Y.-T. Yang, F.-H. Zhao, Y.-X. Che and J.-M. Zheng, *Inorg. Chem. Commun.*, 2011, **14**, 1855-1859.
- 4 W.-C. Song, Q. Pan, P.-C. Song, Q. Zhao, Y.-F. Zeng, T.-L. Hu and X.-H. Bu, *Chem. Commun.*, 2010, **46**, 4890.
- 5 C.-C. Chang, Y.-C. Huang, S.-M. Huang, J.-Y. Wu, Y.-H. Liu and K.-L. Lu, *Cryst. Growth Des.*, 2012, **12**, 3825-3828.
